# Supplementary material for: Endowing recyclability to anti-adhesion materials via designing physically crosslinked polyurethane
Source: Royal Society of Chemistry journal article supplement (doi:10.1039/c9ta07675a), 2019-01-01
Supplement: c9ta07675a1.pdf [file c9ta07675a1.pdf]

## Supplementary Information

### **Bringing recyclability to anti-adhesion materials via designing physically crosslinked polyurethane**

Minhuan Liu,<sup>a#</sup> Danfeng Yu,<sup>a#</sup> Xiubin Xu,<sup>a</sup> Hui Yang,<sup>b</sup> Ian Wyman,<sup>c</sup> Jinben Wang,<sup>b</sup> Xu Wu<sup>a\*</sup>

---

<sup>a</sup>School of Chemistry and Chemical Engineering, Guangzhou University, Guangzhou 510006, China

<sup>b</sup>CAS Key Lab of Colloid, Interface and Chemical Thermodynamics, Institute of Chemistry, Chinese Academy of Sciences, Beijing 100190, China

<sup>c</sup>Department of Chemistry, Queen's University, Kingston K7L 3N6, Canada

\*Email: xuwu@gzhu.edu.cn

<sup>#</sup>M.H. Liu and D.F. Yu contributed equally to this work

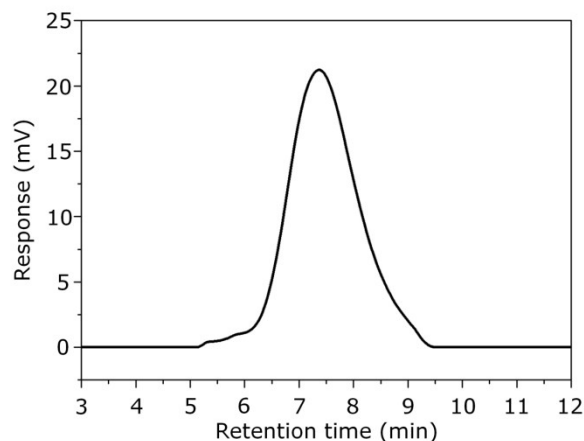

**Fig. S1** SEC trace of the polyurethane.

The molecular weight was characterized via size-exclusion chromatography. The number-average molecular weight  $M_n$  of PCPN was found to be  $\sim 29.41$  kg/mol, and the polydispersity index  $M_w/M_n$  was 1.94.

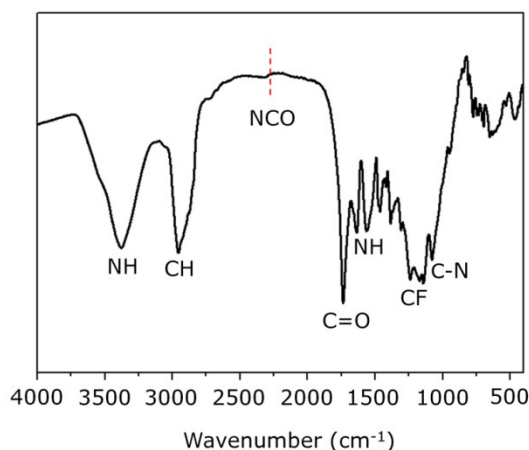

**Fig. S2** FTIR spectrum of the PCPN.

The peaks corresponding to various units were observed in the FTIR spectrum. Notably, the characteristic peak corresponding to the isocyanate groups ( $\sim 2265$  cm<sup>-1</sup>) disappeared from the spectrum, thus indicating that all of the isocyanate groups from IPDI were consumed during the polycondensation reaction.

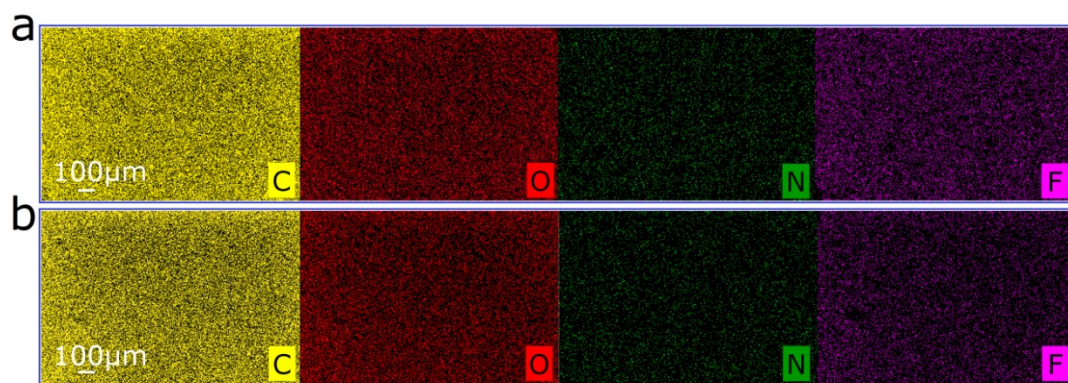

**Fig. S3** EDX mapping of the (a) top and (b) opposite surfaces of the polyurethane film.

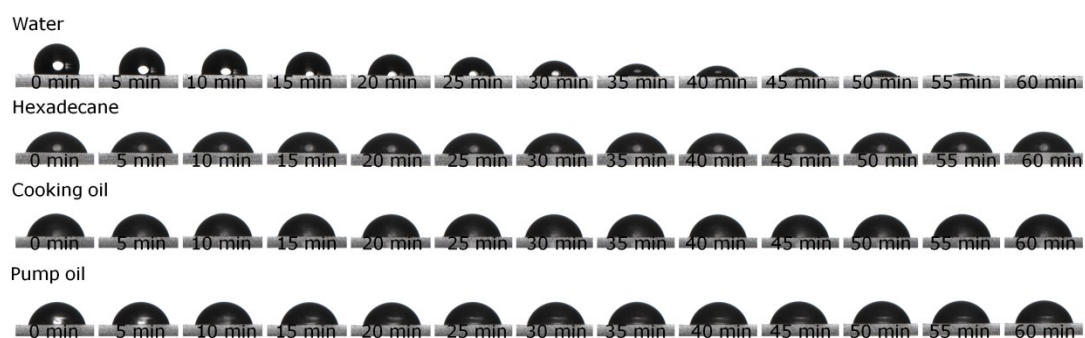

**Fig. S4** Images of droplets recorded at various times after their application onto the film

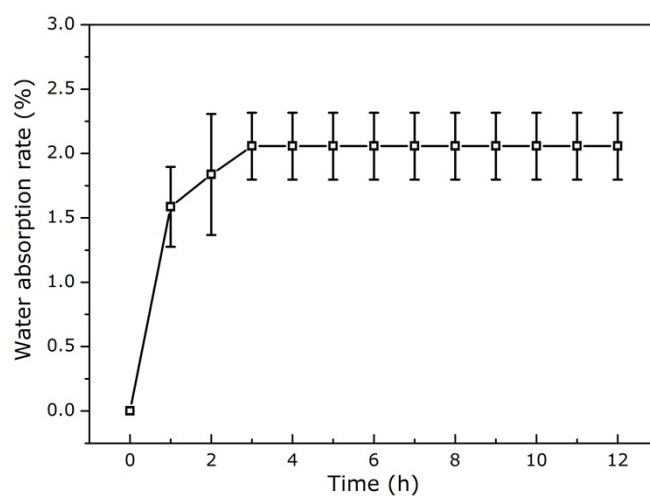

**Fig. S5** Water absorption of the film after several immersion periods.

The water absorption of the film after several immersion periods was investigated, and the water absorption was calculated according to Equation 1.

$$\text{Water absorption (wt\%)} = \frac{W_1 - W_0}{W_0} \times 100\% \quad \text{Equation 1}$$

Where  $W_0$  is the original weight of the dry film, and  $W_1$  is that measured after the film had been immersed in water for various periods. According to these results, the water absorption values were constant to about 2% after a 12 h immersion in water (Fig. S5).

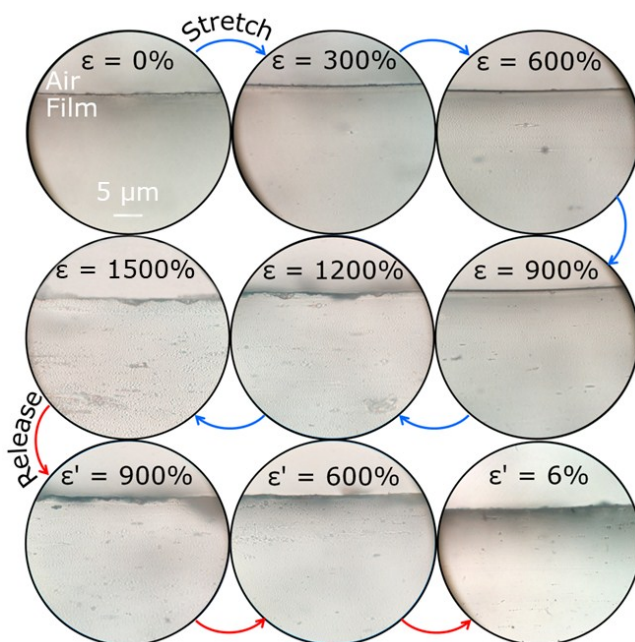

**Fig. S6** Microphotographs of the polyurethane film at various strains during a stretch-and-release cycle.
